# Supplementary material for: Molecular recognition on giant vesicles: coating of phytyl phosphate vesicles with a polysaccharide bearing phytyl chains
Source: Royal Society of Chemistry journal article supplement (doi:10.1039/a908827j), 2000-01-01
Supplement: a908827j.doc [file a908827j.doc]

**Supplementary data**

**Molecular recognition on giant vesicles: coating of phytyl phosphate vesicles with a polysaccharide bearing phytyl chains**

**Sangita Ghosh,*a* Stephen J. Lee,*a* Kensuke Ito,*b* Kazunari Akiyoshi,*b* Junzo Sunamoto,*b* Yoichi Nakatani**a* and Guy Ourisson*a***

*a Centre de Neurochimie CNRS, Laboratoire de Chimie Organique des Substances Naturelles, associé au CNRS, Université Louis Pasteur, 5 rue Blaise Pascal, Strasbourg, France 67084. E-mail : nakatani@chimie.u-strasbg.fr*

*b Department of Synthetic Chemistry and Biological Chemistry, Graduate School of Engineering, Kyoto University, Yoshida-Hommachi, Sakyo-Ku, Kyoto, Japan 606-01*

**Experimental procedure**

Among the various available polysaccharides, we chose pullulan for our work because it is non-ionic and extremely water-soluble. It is obtained commercially in a relatively narrow molecular weight range (MW ~ 55,000 Da). Moreover, we have found that modification of this polysaccharide is easier than for many other polysaccharides.

**Synthesis**

**1**:Phytol (5.63 g, 19 mmol) was dissolved in 90 mL of dry toluene and 4 mL of pyridine. This solution was added to 1,6-diisocyanato hexane (45 mL, 281 mmol) in 90 mL toluene in a nitrogen atmosphere. The temperature was increased to 60 °C. The reaction was followed by TLC; phytol had disapperared after 4 days. The solvents and 1,6-diisocyanato hexane were evaporated in vacuum. IR (Nujol): n 3337, 2272, 1691, 1653 cm-1; 1H NMR (400 MHz, CDCl3, TMS): *d* = 0.84-0.87 (m, phytol 7-CH3, 11-CH3, 15-CH3), 1.03-1.63 (m, -CH2 and phytol 3-CH3), 2.0 (m, -CH2C=C), 3.18 (m, -CH2N-), 3.30 (t, -CH2NCO), 4.6 (d, -OCH2C=C), 5.33 (m, -CH=C-).

**2**:Phytyl *N*-(6-isocyanatohexyl)carbamate **1** (0.547 g, 1.17 mmol) was dissolved in 6 mL of dry pyridine and added to a solution of pullulan (2.0 g, Mw = 10,8000, Mw/ Mn = 1.57) in 50 mL of dry DMSO. The temperature was then increased to 75 °C and the reaction was monitored by HPLC (column: Pharmacia Superose 6, eluent 0.02% NaN3 in water, flow rate: 500 mL/min, detector: TOSOH RI-8020). The reaction was stopped after 3 days and poured into 500 mL of acetone. This was then stored in the refrigerator for 3 days. The precipitate was collected by centrifugation, washed with acetone and dissolved in DMSO. This solution was dialyzed against water (dialysis-tube : Spectrum, Spectra/Por 6, MWCO = 3500). The product was collected by freeze-drying. Yield 1.165 g (55 %). 1H NMR (400 MHz, [D6]DMSO/D2O 10/1, TMS): *d* = 0.85-0.90 (m, phytol 7-CH3, 11-CH3, 15-CH3), 1.0-1.6 (m, -CH2 and phytol 3-CH3), 1.95 (m, -CH2C=C), 3.0-4.0 (m, glucose -CH-, -CH2N-, -CH2NCO), 4.4 (d, -OCH2C=C), 4.7 (s, glucose anomeric proton), 5.05 (d, glucose anomeric proton), 5.33 (m, -CH=C-). The content of phytol groups was determined by 1H NMR as 2.9 per 100 glucose units.

**3**: 2-(1,4-Diazobicyclo-2,2,2-octyl)-4-(fluoresceinamine)-6-morpholinyl-1,3,5-triazine (FD) (5.4 mg, 8.52 mmol) was dissolved in 15 mL of a solution of PHP in dry DMSO (10 mg/mL). The reaction mixture was gently stirred for 24 h at room temperature and then dialyzed against distilled water (dialysis-tube: Spectrum, Spectra/Por6, MWCO = 3500). The product was collected by freeze drying, dissolved in a 0.02 % aqueous solution of NaN3, and applied to SEC. **3** (FD-PHP) was collected, dissolved in distilled water, applied to a Bio-Gel P-2 column (2.5 x 28 cm) and eluted with distilled water, monitoring by UV absorption at 490 nm. 67 mg of pure FD-PHP **3** was obtained (yield 45 %). The substitution degree of FD moieties as calculated from the calibration curve was found to be 0.8 per 1 PHP molecule.

**Microscopies**

2 mg of fluorescent pullulan (FD-PHP **3** or FITC-CHP **4**) was suspended in 1 mL of deionized water and swelled for 8 h at 60 °C. The suspension was sonicated using a bath sonicator for 20 min and then filtered through a Milex-HV filter (pore size 0.45 mm, Millipore). This filtration gave an optically clear solution (0.2 % w/w).

Association of the lipids with the polysaccharides was studied by optical microscopy (differential interference contrast and phase contrast microscopies) as well as by fluorescence microscopy. For phase contrast microscopy, giant vesicles were prepared from the lipids following reported procedures with slight modifications.11 20 mL of a lipid solution (2 mg in 200 mL of methanol) was dropped inside an O-ring cemented on a glass microscopic slide. The solvent was gradually evaporated to yield a thin lipid film. The lipid film was then hydrated with 600 mL of deionized water followed by 40 mL of the aqueous solution of **3** (FD-PHP) or **4** (FITC-CHP) and a cover-glass was placed on top of the O-ring. This microscope slide was then incubated for 2-4 h to allow the polysaccharide to incorporate within the membrane of the vesicles. For differential interference contrast microscopy, a lipid film was prepared in a glass vial, and hydrated with 600 mL of deionized water along with 40 mL of **3** (FD-PHP) or **4** (FITC-CHP). A part of this solution was transferred into the solution chamber of the microscope slide and incubated as mentioned before.

Optical and fluorescence microscopies were carried out with an inverted microscope (Axiovert 135, C. Zeiss) with a charge-coupled device camera (C2400-75i, Hamamatsu Photonics). The images were stored and processed on a 7500/100 PowerMacintosh connected to an image processor (Argus-20, Hamamatsu Photonics).

Samples were prepared for confocal microscopy as described for optical microscopy. Confocal images were obtained in an inverted confocal microscope (LSM Invert 410, Planapo oil immersion lens X63 objective, nD = 1.4, Carl Zeiss).12,14 The sample was excited at 488 nm by an argon laser (band-pass 515-565 filter). The images were stored and processed in a 488 PX microcomputer attached to an image processor (Matrox 4MW). For all microscopy experiments, the thinnest contour criterion was followed.13

One example ofconfocal microscope image (horizontal cross section of di-phytanyl phosphatidylcholine giant vesicles coated with FD-PHP) is shown below.

Confocal microscope image: horizontal cross section of diphytanyl phosphatidylcholine giant liposomes coated with FD-PHP.
